# Supplementary material
Source: PubMed Central journal article supplement (PMC2600711)
Supplement: NIHMS61678-supplement-si20061013_014.pdf [file NIHMS61678-supplement-si20061013_014.pdf]

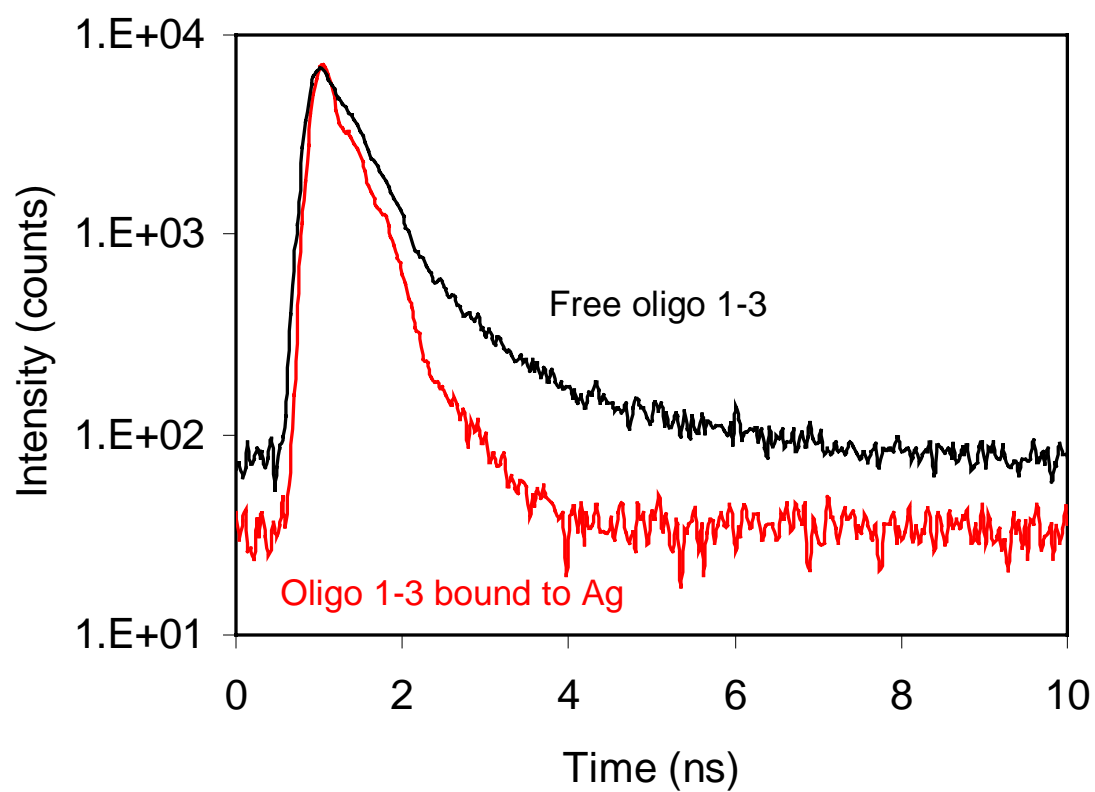

Figure S1. . Emission decay curves for free donor-acceptor pair and bound to the silver particle that were measured by ensemble spectra.

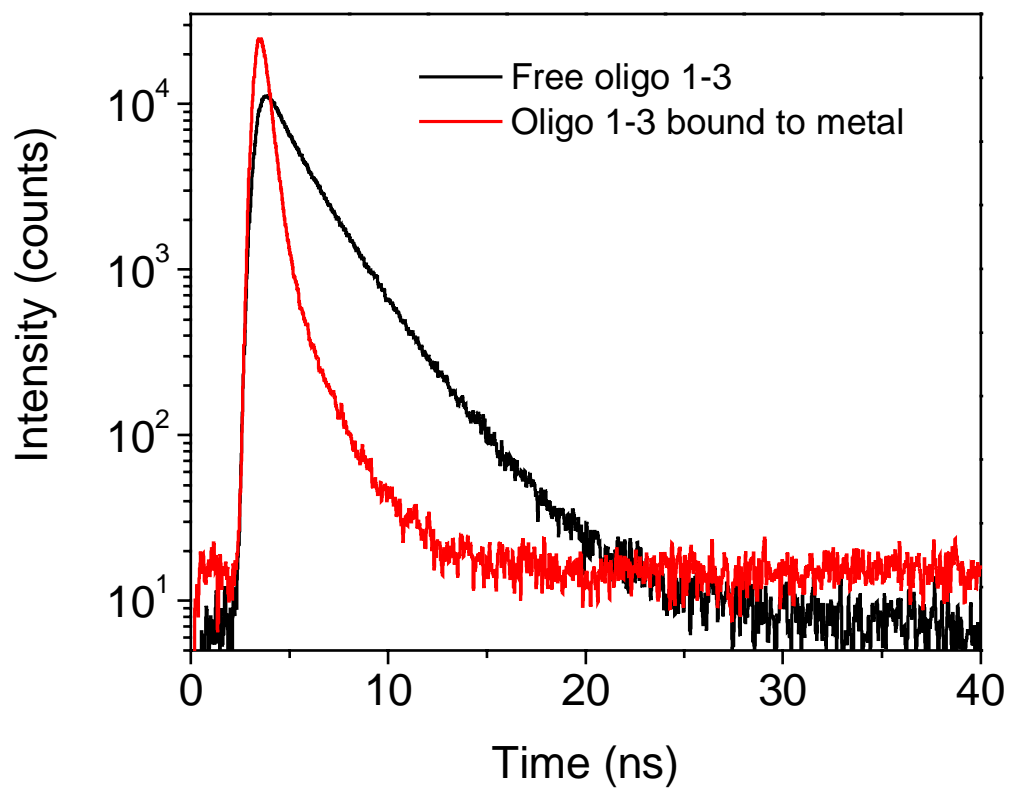

Figure S2. . Emission decay curves for free donor-acceptor pair and bound to the silver particle that were measured by single-molecule spectra.
